# Supplementary material
Source: MDPI journal article supplement (https://www.mdpi.com/2071-1050/12/8/3449)
Supplement: s1 [file s1]

## Appendix 1

### Investigating factors affecting international publishing among Vietnamese academic staff

#### (Main questionnaire items of the Survey Round 1 – English version)

| No | Item                                                                                                            | Answer                 |               |         |           |                    |
|----|-----------------------------------------------------------------------------------------------------------------|------------------------|---------------|---------|-----------|--------------------|
|    |                                                                                                                 | Strongly not important | Not important | Neutral | Important | Strongly important |
| 1  | How important is “Domestic scientific documents” to international publishing?                                   |                        |               |         |           |                    |
| 2  | How important is “International scientific documents” to international publishing?                              |                        |               |         |           |                    |
| 3  | How important is “Research idea/topic” to international publishing?                                             |                        |               |         |           |                    |
| 4  | How important is “Research data” to international publishing?                                                   |                        |               |         |           |                    |
| 5  | How important is “Experimental devices or tools, software for research purposes” to international publishing?   |                        |               |         |           |                    |
| 6  | How important is “Proficiency in foreign language reading of scientific documents” to international publishing? |                        |               |         |           |                    |
| 7  | How important is “Proficiency in foreign language writing of scientific documents” to international publishing? |                        |               |         |           |                    |
| 8  | How important is “Accessibility of research funding                                                             |                        |               |         |           |                    |

|    |                                                                                                 |  |  |  |  |  |
|----|-------------------------------------------------------------------------------------------------|--|--|--|--|--|
|    | sources" to international publishing?                                                           |  |  |  |  |  |
| 9  | How important is "Time available for research purposes" to international publishing?            |  |  |  |  |  |
| 10 | How important is "Data analysis capability" to international publishing?                        |  |  |  |  |  |
| 11 | How important is "Collaboration with domestic peers" to international publishing?               |  |  |  |  |  |
| 12 | How important is "Collaboration with international peers" to international publishing?          |  |  |  |  |  |
| 13 | How important is "Selection of appropriate journal for submission" to international publishing? |  |  |  |  |  |

14. Among the above questions (1-13), we listed 13 factors, which may affect international publishing among Vietnamese academic staff. In your opinion, is there need of adjustment of any factor in terms of terminology? Please, specify and explain:

15. Apart from above factors, in your opinion, is there any factor, which is important or strongly important to international publishing? Please, specify and explain:

## Appendix 2

### Investigating factors affecting international publishing among Vietnamese academic staff

#### (Main questionnaire items of the Survey Round 2 – English version)

| No | Item                                                                                                  | Round 1's answers<br>(Mean and Standard Deviation) | % of respondents in Round 1 selecting "Important" or "Strongly important" | Your answer in Round 1 | Your answer in Round 2<br>(Strongly not important, Not important, Neutral, Important, Strongly important) | Your comment, explanation or suggestion for adjustment in terms of terminology (if necessary) |
|----|-------------------------------------------------------------------------------------------------------|----------------------------------------------------|---------------------------------------------------------------------------|------------------------|-----------------------------------------------------------------------------------------------------------|-----------------------------------------------------------------------------------------------|
| 1  | How important is "Accessibility of domestic scientific documents" to international publishing? *      |                                                    |                                                                           |                        |                                                                                                           |                                                                                               |
| 2  | How important is "Accessibility of international scientific documents" to international publishing? * |                                                    |                                                                           |                        |                                                                                                           |                                                                                               |
| 3  | How important is "Research idea/topic" to international publishing?                                   |                                                    |                                                                           |                        |                                                                                                           |                                                                                               |

|   |                                                                                                                 |  |  |  |  |  |
|---|-----------------------------------------------------------------------------------------------------------------|--|--|--|--|--|
| 4 | How important is "Research data" to international publishing?                                                   |  |  |  |  |  |
| 5 | How important is "Experimental devices or tools, software for research purposes" to international publishing?   |  |  |  |  |  |
| 6 | How important is "Proficiency in foreign language reading of scientific documents" to international publishing? |  |  |  |  |  |
| 7 | How important is "Proficiency in foreign language writing of scientific documents" to international publishing? |  |  |  |  |  |
| 8 | How important is "Accessibility of research funding sources" to international publishing?                       |  |  |  |  |  |
| 9 | How important is "Time available for research purposes" to international publishing?                            |  |  |  |  |  |

|    |                                                                                                             |  |  |  |  |  |
|----|-------------------------------------------------------------------------------------------------------------|--|--|--|--|--|
| 10 | How important is "Data analysis capability" to international publishing?                                    |  |  |  |  |  |
| 11 | How important is "Collaboration with domestic peers" to international publishing?                           |  |  |  |  |  |
| 12 | How important is "Collaboration with international peers" to international publishing?                      |  |  |  |  |  |
| 13 | How important is "Selection of appropriate journal for submission" to international publishing?             |  |  |  |  |  |
| 14 | How important is "Research framework" to international publishing? **                                       |  |  |  |  |  |
| 15 | How important is "Having a research assistant (e.g., masters'/PhD student)" to international publishing? ** |  |  |  |  |  |
| 16 | How important is "Experience and knowledge in responding to reviewers" to                                   |  |  |  |  |  |

|  |                                 |  |  |  |  |  |
|--|---------------------------------|--|--|--|--|--|
|  | international<br>publishing? ** |  |  |  |  |  |
|--|---------------------------------|--|--|--|--|--|

\* Items were adjusted in terms of terminology according to Round 1’s respondents’ suggestions

\*\* Items were newly included in Round 2, according to Round 1’s respondents’ suggestions
